# Supplementary material
Source: PubMed Central journal article supplement (PMC5088282)
Supplement: ajcr0006-2140-f11.pdf [file ajcr0006-2140-f11.pdf]

## Gene expression and biofunctions related to a brain metastasis from a PTC

**Supplement Table 1.** Probe sets differentially expressed in the brain metastatic PTC including its TR vs. non-brain metastatic PTCs and vs. primary brain tumors

| Transcript ID | Gene symbol | Gene name/assignment                                 | Chromosomal location | Brain metastatic PTC + TR vs. non-brain metastatic PTCs |             |             | Brain metastatic PTC + TR vs. primary brain tumors |             |             |
|---------------|-------------|------------------------------------------------------|----------------------|---------------------------------------------------------|-------------|-------------|----------------------------------------------------|-------------|-------------|
|               |             |                                                      |                      | p-value                                                 | FDR p-value | Fold change | p-value                                            | FDR p-value | Fold change |
| 8129134       | ROS1        | ROS proto-oncogene 1, receptor tyrosine kinase       | 6q22                 | 1.93E-14                                                | 5.61E-10    | 13.37       | 1.17E-14                                           | 3.40E-10    | 14.70       |
| 7923534       | MYBPH       | myosin binding protein H                             | 1q32.1               | 1.15E-11                                                | 1.54E-07    | 12.96       | 1.30E-11                                           | 1.23E-07    | 12.67       |
| 8180303       | --          | --                                                   | 11p15.1              | 2.11E-11                                                | 2.04E-07    | 75.90       | 2.65E-11                                           | 1.72E-07    | 70.76       |
| 7927502       | SLC18A3     | solute carrier family 18 member A3                   | 10q11.23             | 1.67E-10                                                | 1.05E-06    | 11.46       | 1.96E-10                                           | 8.73E-07    | 11.10       |
| 7997188       | HP          | haptoglobin                                          | 16q22.2              | 2.58E-10                                                | 1.48E-06    | 87.76       | 6.72E-10                                           | 1.75E-06    | 64.41       |
| 7946977       | SAA2-SAA4   | SAA2-SAA4 readthrough                                | 11p15.1              | 3.70E-10                                                | 1.71E-06    | 5.68        | 2.86E-10                                           | 1.05E-06    | 5.87        |
| 8091385       | CP          | ceruloplasmin (ferroxidase)                          | 3q24q25.1            | 4.65E-10                                                | 1.93E-06    | 37.57       | 2.89E-10                                           | 1.05E-06    | 42.79       |
| 8048864       | CCL20       | chemokine (C-C motif) ligand 20                      | 2q36.3               | 2.53E-09                                                | 8.58E-06    | 121.78      | 1.48E-09                                           | 3.04E-06    | 148.82      |
| 8016128       | GFAP        | glial fibrillary acidic protein                      | 17q21                | 2.95E-09                                                | 8.80E-06    | 3.08        | 1.37E-08                                           | 1.46E-05    | 2.75        |
| 7904953       | RNU1-120P   | RNA, U1 small nuclear 120, pseudogene                | 1q21.2               | 7.32E-09                                                | 1.87E-05    | 15.20       | 3.68E-08                                           | 3.38E-05    | 11.01       |
| 7931108       | DMBT1       | deleted in malignant brain tumors 1                  | 10q26.13             | 7.61E-09                                                | 1.94E-05    | 3.45        | 1.63E-09                                           | 3.17E-06    | 4.04        |
| 8051322       | XDH         | xanthine dehydrogenase                               | 2p23.1               | 1.06E-08                                                | 2.37E-05    | 8.67        | 4.80E-09                                           | 7.11E-06    | 9.93        |
| 8164464       | ZER1        | zyg-11 related, cell cycle regulator                 | 9q34.11              | 2.09E-08                                                | 3.69E-05    | -2.88       | 1.21E-07                                           | 7.44E-05    | -2.52       |
| 8062927       | PI3         | peptidase inhibitor 3, skin-derived                  | 20q13.12             | 2.00E-08                                                | 3.70E-05    | 4.12        | 1.62E-07                                           | 9.20E-05    | 3.32        |
| 8095697       | CXCL1       | C-X-C motif chemokine ligand 1                       | 4q13.3               | 1.90E-08                                                | 3.70E-05    | 11.61       | 5.08E-08                                           | 4.11E-05    | 9.68        |
| 8038556       | NAPSA       | napsin A aspartic peptidase                          | 19q13.33             | 2.01E-08                                                | 3.72E-05    | 11.16       | 4.79E-08                                           | 3.81E-05    | 9.53        |
| 7946983       | SAA2        | serum amyloid A2                                     | 11p15.1              | 3.18E-08                                                | 4.87E-05    | 6.70        | 1.55E-08                                           | 1.70E-05    | 7.49        |
| 8103466       | FSTL5       | folliculin-like 5                                    | 4q32.3               | 6.26E-08                                                | 9.45E-05    | 3.91        | 2.63E-08                                           | 2.36E-05    | 4.31        |
| 7971950       | DACH1       | dachshund family transcription factor 1              | 13q22                | 9.45E-08                                                | 1.25E-04    | 3.82        | 8.17E-08                                           | 5.55E-05    | 3.87        |
| 8109039       | SPINK14     | serine peptidase inhibitor, Kazal type 14 (putative) | 5q32                 | 1.16E-07                                                | 1.53E-04    | 5.40        | 6.30E-08                                           | 4.71E-05    | 5.88        |
| 7906764       | HSPA6       | heat shock protein family A (Hsp70) member 6         | 1q23                 | 1.39E-07                                                | 1.73E-04    | 20.77       | 1.65E-06                                           | 5.31E-04    | 11.79       |
| 7938758       | SAA1        | serum amyloid A1                                     | 11p15.1              | 1.80E-07                                                | 1.98E-04    | 7.69        | 1.42E-07                                           | 7.28E-05    | 7.95        |
| 8044976       | CNTNAP5     | contactin associated protein-like 5                  | 2q14.3               | 2.19E-07                                                | 2.11E-04    | 4.93        | 2.24E-07                                           | 1.10E-04    | 4.91        |
| 7979357       | OTX2        | orthodenticle homeobox 2                             | 14q22.3              | 2.07E-07                                                | 2.16E-04    | 4.66        | 1.28E-07                                           | 6.95E-05    | 4.92        |
| 7927482       | CHAT        | choline O-acetyltransferase                          | 10q11.2              | 1.89E-07                                                | 2.18E-04    | 4.96        | 2.46E-07                                           | 1.25E-04    | 4.79        |
| 8135915       | HILPDA      | hypoxia inducible lipid droplet-associated           | 7q32.1               | 2.26E-07                                                | 2.44E-04    | 13.83       | 2.57E-07                                           | 1.28E-04    | 13.47       |
| 8001918       | RRAD        | Ras-related associated with diabetes                 | 16q22                | 2.61E-07                                                | 2.69E-04    | 15.91       | 2.00E-06                                           | 6.13E-04    | 10.27       |
| 8056457       | SCN1A       | sodium channel, voltage-gated, type I, alpha subunit | 2q24.3               | 3.02E-07                                                | 2.94E-04    | 3.72        | 2.14E-07                                           | 1.07E-04    | 3.87        |
| 8006459       | CCL13       | chemokine (C-C motif) ligand 13                      | 17q11.2              | 4.10E-07                                                | 3.71E-04    | 8.08        | 3.67E-08                                           | 3.46E-05    | 12.69       |
| 8061916       | BPIFB9P     | BPI fold containing family B, member 9, pseudogene   | 20q11.21             | 6.03E-07                                                | 4.85E-04    | 5.56        | 3.31E-07                                           | 1.47E-04    | 6.06        |
| 8130556       | SOD2        | superoxide dismutase 2, mitochondrial                | 6q25.3               | 5.99E-07                                                | 5.05E-04    | 7.48        | 1.79E-06                                           | 5.72E-04    | 6.25        |
| 8010354       | GAA         | glucosidase, alpha; acid                             | 17q25.3              | 8.37E-07                                                | 6.33E-04    | -3.90       | 1.07E-06                                           | 3.78E-04    | -3.81       |
| 8015387       | KRT17       | keratin 17                                           | 17q21.2              | 8.07E-07                                                | 6.39E-04    | 4.64        | 2.77E-07                                           | 1.34E-04    | 5.34        |
| 8075316       | OSM         | oncostatin M                                         | 22q12.2              | 8.33E-07                                                | 6.64E-04    | 3.43        | 6.68E-06                                           | 1.48E-03    | 2.80        |
| 8180340       | RAB7B       | RAB7B, member RAS oncogene family                    | 1q32.1               | 1.17E-06                                                | 8.17E-04    | 3.13        | 3.62E-06                                           | 8.96E-04    | 2.83        |

## Gene expression and biofunctions related to a brain metastasis from a PTC

|         |           |                                                               |            |          |          |       |          |          |       |
|---------|-----------|---------------------------------------------------------------|------------|----------|----------|-------|----------|----------|-------|
| 8109649 | MIR146A   | microRNA 146a                                                 | 5q34       | 1.39E-06 | 9.36E-04 | 3.01  | 8.34E-07 | 2.98E-04 | 3.19  |
| 8030860 | FPR2      | formyl peptide receptor 2                                     | 19q13.41   | 1.45E-06 | 9.78E-04 | 6.86  | 5.19E-06 | 1.24E-03 | 5.61  |
| 8038487 | IL411     | interleukin 4 induced 1                                       | 19q13.33   | 1.44E-06 | 9.85E-04 | 2.87  | 5.77E-06 | 1.28E-03 | 2.54  |
| 8095680 | CXCL8     | C-X-C motif chemokine ligand 8                                | 4q13.3     | 1.58E-06 | 1.04E-03 | 39.82 | 8.73E-07 | 3.27E-04 | 48.30 |
| 7912145 | TNFRSF9   | tumor necrosis factor receptor superfamily, member 9          | 1p36       | 1.69E-06 | 1.08E-03 | 3.77  | 3.15E-06 | 8.20E-04 | 3.52  |
| 8070584 | TMPRSS3   | transmembrane protease, serine 3                              | 21q22.3    | 2.13E-06 | 1.33E-03 | 5.95  | 3.19E-07 | 1.46E-04 | 8.04  |
| 8092970 | APOD      | apolipoprotein D                                              | 3q29       | 2.36E-06 | 1.44E-03 | 24.97 | 1.56E-04 | 1.30E-02 | 8.67  |
| 8043981 | IL1R2     | interleukin 1 receptor, type II                               | 2q12       | 2.97E-06 | 1.79E-03 | 7.74  | 1.18E-05 | 2.08E-03 | 6.12  |
| 7905571 | S100A9    | S100 calcium binding protein A9                               | 1q21       | 3.10E-06 | 1.82E-03 | 8.13  | 3.46E-05 | 4.64E-03 | 5.37  |
| 8036103 | SBSN      | suprabasin                                                    | 19q13.13   | 3.13E-06 | 1.85E-03 | 3.29  | 3.11E-06 | 8.18E-04 | 3.29  |
| 8131803 | IL6       | interleukin 6                                                 | 7p21       | 4.80E-06 | 2.40E-03 | 5.41  | 1.88E-05 | 2.91E-03 | 4.49  |
| 8148184 | FAM83A    | family with sequence similarity 83, member A                  | 8q24.13    | 5.85E-06 | 3.00E-03 | 2.87  | 1.68E-06 | 5.17E-04 | 3.23  |
| 7967318 | HCAR2     | hydroxycarboxylic acid receptor 2                             | 12q24.31   | 6.71E-06 | 3.01E-03 | 2.53  | 7.35E-06 | 1.32E-03 | 2.53  |
| 7967322 | HCAR3     | hydroxycarboxylic acid receptor 3                             | 12q24.31   | 7.42E-06 | 3.30E-03 | 4.23  | 4.39E-06 | 9.46E-04 | 4.53  |
| 7930593 | PLEKHS1   | pleckstrin homology domain containing, family S member 1      | 10q25.3    | 9.04E-06 | 3.79E-03 | 3.33  | 1.20E-05 | 1.95E-03 | 3.23  |
| 7997801 | IL17C     | interleukin 17C                                               | 16q24      | 9.86E-06 | 4.35E-03 | 2.81  | 2.87E-05 | 3.95E-03 | 2.56  |
| 8100994 | CXCL2     | C-X-C motif chemokine ligand 2                                | 4q21       | 8.94E-06 | 4.38E-03 | 10.63 | 1.01E-06 | 3.65E-04 | 17.55 |
| 8112198 | ACTBL2    | actin, beta-like 2                                            | 5q11.2     | 9.48E-06 | 4.54E-03 | 9.47  | 1.17E-06 | 4.06E-04 | 14.89 |
| 7906775 | HSPA6     | heat shock protein family A (Hsp70) member 6                  | 1q23       | 9.76E-06 | 4.61E-03 | 8.61  | 4.66E-04 | 2.62E-02 | 4.32  |
| 8162373 | OGN       | osteoglycin                                                   | 9q22       | 1.28E-05 | 5.61E-03 | 26.62 | 5.69E-04 | 3.03E-02 | -9.15 |
| 7965587 | RNU6-247P | RNA, U6 small nuclear 247, pseudogene                         | 12q22q23.1 | 1.30E-05 | 5.74E-03 | 6.64  | 9.69E-06 | 1.85E-03 | 7.00  |
| 8138310 | DGKB      | diacylglycerol kinase, beta 90 kDa                            | 7p21.2     | 1.72E-05 | 6.42E-03 | 4.50  | 3.44E-05 | 4.49E-03 | 4.09  |
| 8038861 | SIGLEC6   | sialic acid binding Ig-like lectin 6                          | 19q13.3    | 1.71E-05 | 7.03E-03 | 30.33 | 7.96E-06 | 1.63E-03 | 38.97 |
| 8054722 | IL1B      | interleukin 1, beta                                           | 2q14       | 1.69E-05 | 7.10E-03 | 21.10 | 8.06E-04 | 3.69E-02 | 7.63  |
| 8096580 | MITP      | microsomal triglyceride transfer protein                      | 4q24       | 1.89E-05 | 7.44E-03 | 2.02  | 1.32E-05 | 2.32E-03 | 2.06  |
| 7900146 | ZC3H12A   | zinc finger CCCH-type containing 12A                          | 1p34.3     | 2.52E-05 | 9.60E-03 | 3.10  | 6.55E-06 | 1.42E-03 | 3.58  |
| 8061912 | BPIFB9P   | BPI fold containing family B, member 9, pseudogene            | 20q11.21   | 3.04E-05 | 9.69E-03 | 3.43  | 4.25E-06 | 9.48E-04 | 4.27  |
| 8173174 | USP51     | ubiquitin specific peptidase 51                               | Xp11.21    | 2.59E-05 | 9.72E-03 | -3.09 | 4.85E-05 | 6.04E-03 | -2.89 |
| 7904244 | MAB21L3   | mab-21-like 3 (C. elegans)                                    | 1p13.1     | 3.55E-05 | 1.15E-02 | 3.26  | 1.04E-05 | 1.87E-03 | 3.77  |
| 7951217 | MMP7      | matrix metalloproteinase 7                                    | 11q22.2    | 3.81E-05 | 1.20E-02 | 18.25 | 2.91E-05 | 4.20E-03 | 19.70 |
| 8167887 | MAGEH1    | melanoma antigen family H, 1                                  | Xp11.21    | 3.80E-05 | 1.20E-02 | -4.11 | 4.52E-06 | 1.12E-03 | -5.60 |
| 8104234 | TRIP13    | thyroid hormone receptor interactor 13                        | 5p15.33    | 4.03E-05 | 1.31E-02 | 2.44  | 1.33E-04 | 1.17E-02 | 2.20  |
| 8046815 | ZNF804A   | zinc finger protein 804A                                      | 2q32.1     | 5.48E-05 | 1.35E-02 | 4.11  | 5.38E-04 | 2.53E-02 | 3.09  |
| 8147065 | RALYL     | RALY RNA binding protein-like                                 | 8q21.2     | 4.52E-05 | 1.39E-02 | 2.32  | 2.34E-05 | 3.49E-03 | 2.45  |
| 8156873 | INVS      | inversin                                                      | 9q31       | 4.68E-05 | 1.42E-02 | -2.40 | 6.27E-06 | 1.44E-03 | -2.87 |
| 8033445 | CD209     | CD209 molecule                                                | 19p13      | 5.27E-05 | 1.45E-02 | 6.53  | 5.49E-05 | 6.13E-03 | 6.47  |
| 7998063 | TUBB3     | tubulin, beta 3 class III                                     | 16q24.3    | 4.80E-05 | 1.49E-02 | 2.30  | 1.45E-04 | 1.25E-02 | 2.11  |
| 8049075 | B3GNT7    | UDP-GlcNAc:betaGal beta-1,3-N-acetylglucosaminyltransferase 7 | 2q37.1     | 5.68E-05 | 1.50E-02 | 3.23  | 4.32E-06 | 1.05E-03 | 4.42  |
| 7955297 | AQP5      | aquaporin 5                                                   | 12q13      | 5.08E-05 | 1.52E-02 | 10.24 | 1.26E-05 | 2.23E-03 | 14.28 |
| 7921076 | GPATCH4   | G patch domain containing 4                                   | 1q22       | 6.46E-05 | 1.78E-02 | 2.99  | 2.59E-05 | 3.75E-03 | 3.32  |
| 7981333 | RN7SL472P | RNA, 7SL, cytoplasmic 472, pseudogene                         | 4q32.31    | 6.65E-05 | 1.81E-02 | 21.88 | 1.62E-04 | 1.33E-02 | 16.68 |

## Gene expression and biofunctions related to a brain metastasis from a PTC

|         |          |                                                             |          |          |          |        |          |          |       |
|---------|----------|-------------------------------------------------------------|----------|----------|----------|--------|----------|----------|-------|
| 7908907 | ADORA1   | adenosine A1 receptor                                       | 1q32.1   | 7.42E-05 | 1.94E-02 | 2.93   | 1.70E-07 | 9.50E-05 | 6.35  |
| 7923875 | C1orf186 | chromosome 1 open reading frame 186                         | 1q32.1   | 7.92E-05 | 2.02E-02 | 5.00   | 1.29E-05 | 2.23E-03 | 6.78  |
| 8086961 | PFKFB4   | 6-phosphofructo-2-kinase/fructose-2,6-biphosphatase 4       | 3p21.31  | 9.40E-05 | 2.26E-02 | 2.93   | 7.29E-04 | 3.52E-02 | 2.35  |
| 8155794 | C9orf85  | chromosome 9 open reading frame 85                          | 9q21.13  | 1.40E-04 | 2.36E-02 | -3.64  | 4.94E-05 | 5.12E-03 | -4.11 |
| 7992828 | IL32     | interleukin 32                                              | 16p13.3  | 1.16E-04 | 2.39E-02 | 4.31   | 7.26E-04 | 3.20E-02 | 3.32  |
| 8119403 | APOBEC2  | apolipoprotein B mRNA editing enzyme catalytic subunit 2    | 6p21.1   | 1.57E-04 | 2.54E-02 | 3.77   | 1.67E-05 | 2.41E-03 | 4.95  |
| 8156581 | ERCC6L2  | excision repair cross-complementation group 6-like 2        | 9q22.32  | 1.20E-04 | 2.62E-02 | -2.33  | 2.84E-04 | 1.92E-02 | -2.17 |
| 8110841 | LPCAT1   | lysophosphatidylcholine acyltransferase 1                   | 5p15.33  | 1.40E-04 | 2.84E-02 | 3.19   | 7.45E-05 | 8.10E-03 | 3.45  |
| 8168749 | SRPX2    | sushi-repeat containing protein, X-linked 2                 | Xq22.1   | 1.46E-04 | 2.91E-02 | 4.47   | 5.03E-06 | 1.22E-03 | 7.93  |
| 7943413 | BIRC3    | baculoviral IAP repeat containing 3                         | 11q22    | 1.64E-04 | 2.97E-02 | 16.36  | 4.68E-05 | 5.65E-03 | 23.77 |
| 7909371 | CR1      | complement component 3b/4b receptor 1 (Knops blood group)   | 1q32.2   | 1.67E-04 | 3.11E-02 | 3.34   | 7.19E-04 | 3.38E-02 | 2.78  |
| 8169504 | SLC6A14  | solute carrier family 6 (amino acid transporter), member 14 | Xq23     | 1.75E-04 | 3.13E-02 | 15.62  | 1.30E-05 | 2.23E-03 | 33.84 |
| 7983478 | C15orf48 | chromosome 15 open reading frame 48                         | 15q21.1  | 1.71E-04 | 3.23E-02 | 6.27   | 1.92E-05 | 3.01E-03 | 9.84  |
| 8016033 | FAM171A2 | family with sequence similarity 171, member A2              | 17q21.31 | 1.93E-04 | 3.40E-02 | -3.63  | 1.18E-04 | 1.08E-02 | -3.89 |
| 8006865 | PPP1R1B  | protein phosphatase 1, regulatory (inhibitor) subunit 1B    | 17q12    | 2.33E-04 | 3.87E-02 | 4.06   | 2.91E-04 | 1.94E-02 | 3.92  |
| 8126248 | UNC5CL   | unc-5 homolog C (C. elegans)-like                           | 6p21.1   | 2.48E-04 | 3.96E-02 | 5.01   | 1.87E-05 | 2.97E-03 | 8.06  |
| 8104901 | IL7R     | interleukin 7 receptor                                      | 5p13     | 2.88E-04 | 4.38E-02 | 9.07   | 9.49E-04 | 4.08E-02 | 6.81  |
| 7923347 | LAD1     | ladinin 1                                                   | 1q32.1   | 3.19E-04 | 4.65E-02 | 3.49   | 5.01E-08 | 4.24E-05 | 16.03 |
| 8158725 | ABL1     | ABL proto-oncogene 1, non-receptor tyrosine kinase          | 9q34.1   | 3.16E-04 | 4.66E-02 | -2.71  | 1.28E-04 | 1.17E-02 | -3.01 |
| 8083233 | ZIC1     | Zic family member 1                                         | 3q24     | 6.98E-06 |          | 17.37  | 3.07E-02 |          | -2.69 |
| 8072678 | HMOX1    | heme oxygenase (decycling) 1                                | 22q13.1  | 4.33E-05 |          | 4.92   | 2.11E-03 |          | 2.79  |
| 8099476 | PROM1    | prominin 1                                                  | 4p15.32  | 1.17E-04 |          | 16.06  | 1.73E-03 |          | 7.62  |
| 7988350 | DUOX2    | dual oxidase 2                                              | 15q15.3  | 1.32E-04 |          | -19.36 | 4.31E-02 |          | 3.55  |
| 7953603 | C1S      | complement component 1, s subcomponent                      | 12p13    | 1.58E-04 |          | 13.15  | 1.70E-02 |          | -3.98 |
| 8122701 | -        | -                                                           | 6q25.1   | 1.65E-04 |          | -5.66  | 2.95E-03 |          | -3.43 |
| 8102342 | ELOVL6   | ELOVL fatty acid elongase 6                                 | 4q25     | 1.66E-04 |          | 7.20   | 1.15E-02 |          | 3.09  |
| 8054712 | IL1A     | interleukin 1, alpha                                        | 2q14     | 1.68E-04 |          | 8.26   | 1.67E-02 |          | 3.09  |
| 8156633 | CCDC180  | coiled-coil domain containing 180                           | 9q22.33  | 1.76E-04 |          | -2.72  | 1.10E-03 |          | -2.25 |
| 8157446 | ORM1     | orosomucoid 1                                               | 9q32     | 1.98E-04 |          | 4.95   | 3.07E-05 |          | 6.43  |
| 7940441 | PGA3     | pepsinogen 3, group I (pepsinogen A)                        | 11q12.2  | 2.67E-04 |          | 3.77   | 9.14E-04 |          | 3.19  |
| 8157700 | RABGAP1  | RAB GTPase activating protein 1                             | 9q34.11  | 2.85E-04 |          | -2.84  | 2.51E-03 |          | -2.23 |
| 8111220 | CDH18    | cadherin 18, type 2                                         | 5p14.3   | 3.02E-04 |          | 2.17   | 2.58E-04 |          | 2.22  |
| 7940177 | OR4D10   | olfactory receptor, family 4, subfamily D, member 10        | 11q12    | 3.19E-04 |          | 7.26   | 8.51E-05 |          | 9.74  |
| 8034837 | DNAJB1   | DnaJ (Hsp40) homolog, subfamily B, member 1                 | 19p13.2  | 3.20E-04 |          | 4.41   | 3.91E-03 |          | 2.96  |
| 8147469 | CPQ      | carboxypeptidase Q                                          | 8q22.2   | 3.28E-04 |          | -3.12  | 2.58E-04 |          | -3.23 |
| 8094743 | RHOH     | ras homolog family member H                                 | 4p13     | 3.42E-04 |          | 3.23   | 1.18E-02 |          | 2.06  |
| 8156601 | ERCC6L2  | excision repair cross-complementation group 6-like 2        | 9q22.32  | 3.53E-04 |          | -2.58  | 1.96E-03 |          | -2.15 |
| 8130580 | SNORA29  | small nucleolar RNA, H/ACA box 29                           | 6q25.3   | 3.69E-04 |          | 3.17   | 3.84E-04 |          | 3.15  |
| 8140151 | RFC2     | replication factor C (activator 1) 2, 40 kDa                | 7q11.23  | 3.75E-04 |          | 2.12   | 1.08E-05 |          | 2.91  |
| 8147461 | SDC2     | syndecan 2                                                  | 8q22.1   | 3.88E-04 |          | -2.43  | 1.07E-04 |          | -2.77 |
| 8132960 | SNORA22  | Small nucleolar RNA SNORA22                                 | 7p11.2   | 3.89E-04 |          | 2.69   | 1.62E-03 |          | 2.30  |

## Gene expression and biofunctions related to a brain metastasis from a PTC

|         |           |                                                         |          |          |       |          |        |
|---------|-----------|---------------------------------------------------------|----------|----------|-------|----------|--------|
| 8109677 | GABRG2    | gamma-aminobutyric acid (GABA) A receptor, gamma 2      | 5q34     | 4.11E-04 | 2.43  | 1.55E-04 | 2.67   |
| 8115584 | CCNJL     | cyclin J-like                                           | 5q33.3   | 4.53E-04 | 3.12  | 1.27E-05 | 5.06   |
| 8180246 | --        | --                                                      | --       | 4.73E-04 | -5.54 | 5.84E-03 | -3.53  |
| 7940431 | PGA3      | pepsinogen 3, group I (pepsinogen A)                    | 11q12.2  | 5.30E-04 | 3.86  | 1.92E-03 | 3.20   |
| 8138566 | IGF2BP3   | insulin-like growth factor 2 mRNA binding protein 3     | 7p11     | 5.35E-04 | 3.34  | 9.50E-05 | 4.30   |
| 7909164 | CTSE      | cathepsin E                                             | 1q31     | 5.69E-04 | 92.12 | 2.17E-04 | 155.04 |
| 7952339 | SNORD14C  | small nucleolar RNA, C/D box 14C                        | 11q24.1  | 5.93E-04 | 9.74  | 4.51E-02 | 3.11   |
| 8106168 | --        | Y_RNA ENSG00000200833                                   | 5q13.2   | 5.94E-04 | 2.51  | 5.69E-04 | 2.52   |
| 7944751 | C11orf63  | chromosome 11 open reading frame 63                     | 11q24.1  | 6.01E-04 | -3.32 | 6.34E-05 | -4.61  |
| 7983910 | AQP9      | aquaporin 9                                             | 15q      | 6.02E-04 | 13.61 | 1.14E-03 | 11.19  |
| 7990818 | BCL2A1    | BCL2-related protein A1                                 | 15q24.3  | 6.13E-04 | 4.28  | 9.18E-04 | 4.00   |
| 7908639 | C1orf106  | chromosome 1 open reading frame 106                     | 1q32.1   | 6.54E-04 | 2.49  | 4.25E-04 | 2.61   |
| 8032509 | GNG7      | guanine nucleotide binding protein (G protein), gamma 7 | 19p13.3  | 6.83E-04 | -2.28 | 2.01E-07 | -5.66  |
| 7940421 | PGA3      | pepsinogen 3, group I (pepsinogen A)                    | 11q12.2  | 6.96E-04 | 3.67  | 2.50E-03 | 3.04   |
| 7905533 | IVL       | involucrin                                              | 1q21     | 7.00E-04 | 2.73  | 4.57E-04 | 2.88   |
| 8124534 | HIST1H4L  | histone cluster 1, H4I                                  | 6p22.1   | 7.22E-04 | 3.27  | 4.98E-03 | 2.50   |
| 7924508 | SUSD4     | sushi domain containing 4                               | 1q41     | 7.33E-04 | 3.19  | 2.38E-05 | 5.16   |
| 8118310 | HSPA1A    | heat shock 70 kDa protein 1A                            | 6p21.3   | 7.39E-04 | 6.05  | 9.50E-03 | 3.52   |
| 8025402 | ANGPTL4   | angiotensin-like 4                                      | 19p13.3  | 7.58E-04 | 11.86 | 6.51E-05 | 25.38  |
| 8179322 | HSPA1A    | heat shock 70 kDa protein 1A                            | 6p21.3   | 7.71E-04 | 6.09  | 9.60E-03 | 3.55   |
| 8123864 | TFAP2A    | transcription factor AP-2 alpha                         | 6p24.3   | 7.76E-04 | 3.36  | 5.67E-03 | 2.53   |
| 8157027 | NIPSNAP3B | nipsnap homolog 3B (C. elegans)                         | 9q31.1   | 8.39E-04 | -3.03 | 2.86E-03 | -2.57  |
| 7951928 | DSCAML1   | Down syndrome cell adhesion molecule like 1             | 11q23    | 8.51E-04 | 2.72  | 5.55E-04 | 2.83   |
| 7907861 | XPR1      | xenotropic and polytropic retrovirus receptor 1         | 1q25.1   | 8.52E-04 | 3.02  | 2.79E-06 | 7.13   |
| 7969640 | CLDN10    | claudin 10                                              | 13q32.1  | 9.46E-04 | 6.07  | 9.87E-05 | 10.21  |
| 8026272 | IL27RA    | interleukin 27 receptor, alpha                          | 19p13.11 | 1.01E-03 | 3.65  | 5.75E-04 | 3.99   |
| 8162388 | OMD       | osteomodulin                                            | 9q22.31  | 1.03E-03 | 7.74  | 1.55E-05 | -22.52 |
| 8104449 | CCT5      | chaperonin containing TCP1, subunit 5 (epsilon)         | 5p15.2   | 1.04E-03 | 2.50  | 4.41E-03 | 2.13   |
| 7928602 | SFTPA1    | surfactant protein A1                                   | 10q22.3  | 1.05E-03 | 30.04 | 1.42E-04 | 71.83  |
| 7928632 | SFTPA1    | surfactant protein A1                                   | 10q22.3  | 1.05E-03 | 30.04 | 1.42E-04 | 71.83  |
| 8097116 | RNU4-33P  | RNA, U4 small nuclear 33, pseudogene                    | --       | 1.08E-03 | 2.44  | 6.65E-04 | 2.58   |
| 8109639 | PTTG1     | pituitary tumor-transforming 1                          | 5q35.1   | 1.10E-03 | 3.70  | 3.55E-06 | 9.46   |
| 8156604 | ERCC6L2   | excision repair cross-complementation group 6-like 2    | 9q22.32  | 1.10E-03 | -2.26 | 8.46E-04 | -2.32  |
| 7915472 | SLC2A1    | solute carrier family 2 member 1                        | 1p34.2   | 1.12E-03 | 4.81  | 6.13E-04 | 5.41   |
| 7975987 | SNORA46   | small nucleolar RNA, H/ACA box 46                       | 14q24.3  | 1.12E-03 | 3.24  | 3.53E-03 | 2.75   |
| 7922756 | NMNAT2    | nicotinamide nucleotide adenyltransferase 2             | 1q25     | 1.13E-03 | 6.39  | 4.52E-02 | -2.72  |
| 7909681 | PROX1     | prospero homeobox 1                                     | 1q41     | 1.14E-03 | 4.00  | 1.30E-05 | 9.30   |
| 8124848 | IER3      | immediate early response 3                              | 6p21.3   | 1.15E-03 | 4.55  | 2.15E-03 | 4.06   |
| 8179704 | IER3      | immediate early response 3                              | 6p21.3   | 1.15E-03 | 4.55  | 2.15E-03 | 4.06   |
| 8106141 | FCHO2     | FCH domain only 2                                       | 5q13.2   | 1.18E-03 | 2.42  | 5.41E-05 | 3.44   |
| 7934698 | SFTPA2    | surfactant protein A2                                   | 10q22.3  | 1.19E-03 | 28.20 | 1.84E-04 | 63.22  |

## Gene expression and biofunctions related to a brain metastasis from a PTC

|         |          |                                                                      |               |          |       |          |        |
|---------|----------|----------------------------------------------------------------------|---------------|----------|-------|----------|--------|
| 7934708 | SFTP2    | surfactant protein A2                                                | 10q22.3       | 1.19E-03 | 28.20 | 1.84E-04 | 63.22  |
| 7920244 | S100A8   | S100 calcium binding protein A8                                      | 1q21          | 1.23E-03 | 15.82 | 1.97E-02 | 6.11   |
| 7993638 | TMC5     | transmembrane channel-like 5                                         | 16p12.3       | 1.27E-03 | 3.33  | 2.25E-04 | 4.09   |
| 7996022 | CCL22    | chemokine (C-C motif) ligand 22                                      | 16q13         | 1.31E-03 | 2.62  | 9.32E-04 | 2.73   |
| 7977046 | TNFAIP2  | tumor necrosis factor, alpha-induced protein 2                       | 14q32         | 1.36E-03 | 7.55  | 2.45E-03 | 6.49   |
| 8046408 | PDK1     | pyruvate dehydrogenase kinase, isozyme 1                             | 2q31.1        | 1.37E-03 | 3.42  | 1.46E-03 | 3.38   |
| 8029465 | BCL3     | B-cell CLL/lymphoma 3                                                | 19q13.32      | 1.37E-03 | 3.64  | 3.09E-04 | 4.55   |
| 8157038 | SLC44A1  | solute carrier family 44 (choline transporter), member 1             | 9q31.1        | 1.43E-03 | -3.33 | 1.77E-02 | -2.26  |
| 7952335 | SNORD14E | small nucleolar RNA, C/D box 14E                                     | 11q24.1       | 1.48E-03 | 13.41 | 8.05E-03 | 7.63   |
| 7909441 | G0S2     | G0/G1 switch 2                                                       | 1q32.2        | 1.52E-03 | 6.18  | 5.85E-04 | 7.74   |
| 8118314 | HSPA1B   | heat shock 70 kDa protein 1B                                         | 6p21.3        | 1.54E-03 | 6.11  | 9.28E-03 | 4.02   |
| 8178435 | IER3     | immediate early response 3                                           | 6p21.3        | 1.63E-03 | 4.61  | 2.12E-03 | 4.38   |
| 8090433 | MGLL     | monoglyceride lipase                                                 | 3q21.3        | 1.63E-03 | 4.32  | 8.08E-03 | 3.19   |
| 8156743 | FOXE1    | forkhead box E1 (thyroid transcription factor 2)                     | 9q22          | 1.64E-03 | -3.74 | 3.10E-04 | 4.98   |
| 8178086 | HSPA1B   | heat shock 70 kDa protein 1B                                         | 6p21.3        | 1.66E-03 | 6.10  | 9.98E-03 | 4.00   |
| 8179324 | HSPA1B   | heat shock 70 kDa protein 1B                                         | 6p21.3        | 1.66E-03 | 6.10  | 9.98E-03 | 4.00   |
| 8114249 | CXCL14   | chemokine (C-X-C motif) ligand 14                                    | 5q31          | 1.67E-03 | 52.97 | 3.70E-04 | 117.45 |
| 8098637 | CYP4V2   | cytochrome P450, family 4, subfamily V, polypeptide 2                | 4q35.2        | 1.75E-03 | -2.67 | 5.51E-03 | -2.29  |
| 7988426 | SLC30A4  | solute carrier family 30 (zinc transporter), member 4                | 15q21.1       | 1.81E-03 | -2.66 | 8.77E-04 | -2.92  |
| 8075886 | IL2RB    | interleukin 2 receptor, beta                                         | 22q13.1       | 1.82E-03 | 3.91  | 3.74E-03 | 3.46   |
| 8140504 | MAGI2    | membrane associated guanylate kinase, WW and PDZ domain containing 2 | 7q21.11       | 1.83E-03 | -3.01 | 1.27E-04 | -4.51  |
| 8065344 | FOXA2    | forkhead box A2                                                      | 20p11         | 1.88E-03 | 2.55  | 7.04E-04 | 2.89   |
| 7937079 | BNIP3    | BCL2/adenovirus E1B 19 kDa interacting protein 3                     | -             | 1.91E-03 | 2.74  | 4.12E-06 | 6.68   |
| 7976698 | EML1     | echinoderm microtubule associated protein like 1                     | 14q32         | 1.93E-03 | -4.17 | 2.49E-03 | -3.97  |
| 8103894 | ENPP6    | ectonucleotide pyrophosphatase/phosphodiesterase 6                   | 4q35.1        | 1.95E-03 | 3.04  | 3.67E-09 | -43.97 |
| 8126820 | GPR110   | G protein-coupled receptor 110                                       | 6p12.3        | 2.23E-03 | 6.42  | 1.30E-06 | 54.13  |
| 8080847 | C3orf14  | chromosome 3 open reading frame 14                                   | 3p14.2        | 2.29E-03 | -3.02 | 2.50E-04 | -4.11  |
| 8037374 | PLAUR    | plasminogen activator, urokinase receptor                            | 19q13         | 2.32E-03 | 3.87  | 1.47E-02 | 2.77   |
| 7923850 | SLC26A9  | solute carrier family 26 (anion exchanger), member 9                 | 1q32.1        | 2.35E-03 | 12.40 | 3.87E-04 | 23.32  |
| 8139433 | MYO1G    | myosin IG                                                            | 7p13          | 2.49E-03 | 25.19 | 5.86E-04 | 48.18  |
| 8167027 | RGN      | regucalcin                                                           | Xp11.3        | 2.60E-03 | -2.89 | 3.72E-04 | 3.77   |
| 8155930 | GCNT1    | glucosaminyl (N-acetyl) transferase 1, core 2                        | 9q13          | 2.62E-03 | -4.66 | 3.14E-02 | 2.73   |
| 7925589 | SMYD3    | SET and MYND domain containing 3                                     | 1q44          | 2.63E-03 | 3.81  | 6.28E-05 | 7.63   |
| 8130645 | PARK2    | parkin RBR E3 ubiquitin protein ligase                               | 6q26          | 2.70E-03 | -2.34 | 1.17E-04 | -3.43  |
| 7918533 | ADORA3   | adenosine A3 receptor                                                | 1p13.2        | 2.72E-03 | 3.75  | 4.21E-02 | -2.26  |
| 8104307 | C5orf38  | chromosome 5 open reading frame 38                                   | 5p15.33       | 2.91E-03 | 5.03  | 2.92E-03 | 5.03   |
| 8106923 | NR2F1    | nuclear receptor subfamily 2, group F, member 1                      | 5q14          | 2.97E-03 | 2.88  | 1.69E-03 | -3.13  |
| 8162059 | SLC28A3  | solute carrier family 28 (concentrative nucleoside transport         | 9q21.32q21.33 | 3.08E-03 | 3.68  | 3.12E-04 | 5.55   |
| 8163795 | PSMD5    | proteasome (prosome, macropain) 26S subunit, non-ATPase, 5           | 9q33.2        | 3.12E-03 | -3.66 | 1.65E-03 | -4.11  |
| 7930921 | BAG3     | BCL2-associated athanogene 3                                         | 10q26.11      | 3.33E-03 | 2.39  | 8.90E-04 | 2.81   |
| 8087739 | CISH     | cytokine inducible SH2-containing protein                            | 3p21.3        | 3.49E-03 | 2.50  | 1.62E-06 | 7.76   |

## Gene expression and biofunctions related to a brain metastasis from a PTC

|         |            |                                                       |          |          |       |          |        |
|---------|------------|-------------------------------------------------------|----------|----------|-------|----------|--------|
| 7933084 | NAMPT      | nicotinamide phosphoribosyltransferase                | 7q22.3   | 3.59E-03 | 4.88  | 2.50E-02 | 3.12   |
| 8144488 | LINC00965  | long intergenic non-protein coding RNA 965            | 8p23.1   | 3.62E-03 | -2.72 | 2.41E-03 | -2.88  |
| 8070467 | TMPRSS2    | transmembrane protease, serine 2                      | 21q22.3  | 3.63E-03 | 10.95 | 1.60E-04 | 33.23  |
| 8065607 | PLAGL2     | pleiomorphic adenoma gene-like 2                      | 20q11.21 | 3.65E-03 | 2.24  | 7.92E-04 | 2.67   |
| 8142120 | NAMPT      | nicotinamide phosphoribosyltransferase                | 7q22.3   | 3.74E-03 | 4.79  | 3.48E-02 | 2.87   |
| 8161418 | -          | -                                                     | -        | 3.81E-03 | 3.53  | 1.41E-04 | 6.54   |
| 8051133 | FTH1P3     | ferritin, heavy polypeptide 1 pseudogene 3            | 2p23.3   | 3.95E-03 | 2.46  | 5.43E-03 | 2.36   |
| 8062395 | NNAT       | neuronatin                                            | 20q11.23 | 3.97E-03 | 60.79 | 1.81E-02 | 24.33  |
| 8064939 | TMX4       | thioredoxin-related transmembrane protein 4           | 20p12    | 4.10E-03 | -2.96 | 1.52E-02 | -2.41  |
| 8009443 | ARSG       | arylsulfatase G                                       | 17q24.2  | 4.27E-03 | -2.47 | 3.22E-03 | -2.57  |
| 7912638 | TMEM51-AS1 | TMEM51 antisense RNA 1                                | 1p36.21  | 4.33E-03 | 2.42  | 6.91E-03 | 2.28   |
| 8099834 | TLR1       | toll-like receptor 1                                  | 4p14     | 4.59E-03 | 2.74  | 3.67E-03 | -2.80  |
| 7968212 | WASF3      | WAS protein family, member 3                          | 13q12    | 4.62E-03 | -3.40 | 1.10E-04 | -6.85  |
| 8120552 | FAM135A    | family with sequence similarity 135, member A         | 6q13     | 4.70E-03 | -2.54 | 7.31E-04 | -3.30  |
| 8144410 | LINC00965  | long intergenic non-protein coding RNA 965            | 8p23.1   | 4.72E-03 | -3.50 | 5.77E-03 | -3.37  |
| 7940175 | OR4D6      | olfactory receptor, family 4, subfamily D, member 6   | 11q12.1  | 4.76E-03 | 5.40  | 1.48E-03 | 7.22   |
| 7908924 | PRELP      | proline/arginine-rich end leucine-rich repeat protein | 1q32.1   | 4.84E-03 | 4.24  | 4.23E-03 | -4.33  |
| 7919028 | TBX15      | T-box 15                                              | 1p11.1   | 4.86E-03 | 3.25  | 2.91E-05 | -8.42  |
| 7978544 | EGLN3      | egl-9 family hypoxia-inducible factor 3               | 14q13.1  | 4.92E-03 | 3.77  | 1.08E-02 | 3.25   |
| 8086185 | PLCD1      | phospholipase C, delta 1                              | 3p22.2   | 4.92E-03 | -2.73 | 1.39E-03 | -3.31  |
| 7953735 | LINC00965  | long intergenic non-protein coding RNA 965            | 8p23.1   | 5.11E-03 | -3.16 | 7.00E-03 | -2.99  |
| 8032834 | LRG1       | leucine-rich alpha-2-glycoprotein 1                   | 19p13.3  | 5.11E-03 | 2.30  | 8.89E-04 | 2.78   |
| 7938777 | LDHA       | lactate dehydrogenase A                               | 11p15.4  | 5.11E-03 | 3.14  | 3.87E-02 | 2.20   |
| 8043441 | IGKV1D-27  | immunoglobulin kappa variable 1D-27 (pseudogene)      | 2p11.2   | 5.14E-03 | 4.29  | 6.82E-03 | 4.05   |
| 7907171 | BLZF1      | basic leucine zipper nuclear factor 1                 | 1q24     | 5.22E-03 | 2.13  | 2.30E-03 | 2.34   |
| 7903959 | PIFO       | primary cilia formation                               | 1p13.2   | 5.36E-03 | -2.72 | 1.99E-02 | 2.23   |
| 7922976 | PTGS2      | prostaglandin-endoperoxide synthase 2                 | 1q31.1   | 5.41E-03 | 10.38 | 1.24E-03 | 17.62  |
| 8025601 | ICAM1      | intercellular adhesion molecule 1                     | 19p13.2  | 5.48E-03 | 5.44  | 2.60E-04 | 12.12  |
| 8116983 | CD83       | CD83 molecule                                         | 6p23     | 5.52E-03 | 3.03  | 1.76E-03 | 3.66   |
| 8025382 | CERS4      | ceramide synthase 4                                   | 19p13.2  | 5.73E-03 | -2.38 | 1.09E-02 | 2.18   |
| 8006433 | CCL2       | chemokine (C-C motif) ligand 2                        | 17q12    | 5.86E-03 | 12.01 | 1.38E-02 | 8.64   |
| 7937852 | SLC22A18   | solute carrier family 22, member 18                   | 11p15.5  | 5.87E-03 | 2.10  | 2.47E-03 | 2.32   |
| 8162610 | CDC14B     | cell division cycle 14B                               | 9q22.3   | 5.94E-03 | -3.16 | 7.52E-03 | -3.03  |
| 7922243 | METTL18    | methyltransferase like 18                             | 1q24.2   | 6.04E-03 | 3.21  | 6.56E-04 | 4.81   |
| 7931930 | PRKCQ      | protein kinase C, theta                               | 10p15    | 6.07E-03 | -2.21 | 5.40E-05 | 4.06   |
| 7931914 | IL2RA      | interleukin 2 receptor, alpha                         | 10p15.1  | 6.08E-03 | 4.26  | 2.50E-02 | 3.09   |
| 7967544 | SCARB1     | scavenger receptor class B, member 1                  | 12q24.31 | 6.24E-03 | -2.50 | 8.25E-04 | -3.35  |
| 7984588 | THSD4      | thrombospondin, type I, domain containing 4           | 15q23    | 6.28E-03 | -2.39 | 9.22E-09 | -25.45 |
| 8054580 | BUB1       | BUB1 mitotic checkpoint serine/threonine kinase       | 2q13     | 6.34E-03 | 4.47  | 5.12E-04 | 8.13   |
| 8006594 | CCL18      | C-C motif chemokine ligand 18                         | 17q12    | 6.43E-03 | 14.96 | 1.92E-04 | 68.79  |
| 8144416 | LINC00965  | long intergenic non-protein coding RNA 965            | 8p23.1   | 6.48E-03 | -3.60 | 8.52E-03 | -3.40  |

## Gene expression and biofunctions related to a brain metastasis from a PTC

|         |           |                                                                |         |          |       |          |       |
|---------|-----------|----------------------------------------------------------------|---------|----------|-------|----------|-------|
| 8144418 | LINC00965 | long intergenic non-protein coding RNA 965                     | 8p23.1  | 6.48E-03 | -3.60 | 8.52E-03 | -3.40 |
| 8144490 | LINC00965 | long intergenic non-protein coding RNA 965                     | 8p23.1  | 6.48E-03 | -3.60 | 8.52E-03 | -3.40 |
| 8144492 | LINC00965 | long intergenic non-protein coding RNA 965                     | 8p23.1  | 6.48E-03 | -3.60 | 8.52E-03 | -3.40 |
| 8148501 | PTP4A3    | protein tyrosine phosphatase type IVA, member 3                | 8q24.3  | 6.59E-03 | 4.15  | 2.38E-04 | 8.82  |
| 7909214 | RASSF5    | Ras association domain family member 5                         | 1q32.1  | 6.66E-03 | 3.05  | 3.26E-03 | 3.45  |
| 7946401 | ST5       | suppression of tumorigenicity 5                                | 11p15   | 6.68E-03 | 2.76  | 9.50E-03 | 2.62  |
| 8098423 | NEIL3     | nei endonuclease VIII-like 3 (E. coli)                         | 4q34.3  | 6.93E-03 | 2.83  | 3.99E-03 | 3.10  |
| 8042144 | REL       | v-rel avian reticuloendotheliosis viral oncogene homolog       | 2p13    | 6.96E-03 | 2.99  | 1.12E-03 | 4.12  |
| 8111772 | DAB2      | Dab, mitogen-responsive phosphoprotein, homolog 2 (Drosophila) | 5p13.1  | 7.05E-03 | 3.89  | 3.54E-02 | -2.73 |
| 8149218 | LINC00965 | long intergenic non-protein coding RNA 965                     | 8p23.1  | 7.11E-03 | -3.59 | 9.38E-03 | -3.39 |
| 8149220 | LINC00965 | long intergenic non-protein coding RNA 965                     | 8p23.1  | 7.11E-03 | -3.59 | 9.38E-03 | -3.39 |
| 8149222 | LINC00965 | long intergenic non-protein coding RNA 965                     | 8p23.1  | 7.11E-03 | -3.59 | 9.38E-03 | -3.39 |
| 8149224 | LINC00965 | long intergenic non-protein coding RNA 965                     | 8p23.1  | 7.11E-03 | -3.59 | 9.38E-03 | -3.39 |
| 8149226 | LINC00965 | long intergenic non-protein coding RNA 965                     | 8p23.1  | 7.11E-03 | -3.59 | 9.38E-03 | -3.39 |
| 8157300 | BSPRY     | B-box and SPRY domain containing                               | 9q32    | 7.20E-03 | -2.28 | 9.58E-04 | 2.98  |
| 8141076 | PON2      | paraoxonase 2                                                  | 7q21.3  | 7.29E-03 | 2.62  | 1.30E-02 | 2.41  |
| 8099541 | QDPR      | quinoid dihydropteridine reductase                             | 4p15.31 | 7.30E-03 | -3.34 | 1.33E-02 | -3.00 |
| 8149161 | LINC00965 | long intergenic non-protein coding RNA 965                     | 8p23.1  | 7.31E-03 | -3.30 | 7.36E-03 | -3.29 |
| 8149210 | LINC00965 | long intergenic non-protein coding RNA 965                     | 8p23.1  | 7.31E-03 | -3.30 | 7.36E-03 | -3.29 |
| 8149228 | LINC00965 | long intergenic non-protein coding RNA 965                     | 8p23.1  | 7.37E-03 | -3.14 | 1.11E-02 | -2.92 |
| 8088979 | VGLL3     | vestigial-like family member 3                                 | 3p12.1  | 7.51E-03 | 2.31  | 3.71E-03 | 2.55  |
| 8043697 | ANKRD36B  | ankyrin repeat domain 36B                                      | 2q11.2  | 7.52E-03 | -3.05 | 2.11E-02 | -2.56 |
| 8161964 | FRMD3     | FERM domain containing 3                                       | 9q21.32 | 7.57E-03 | -3.99 | 3.35E-03 | 4.87  |
| 8167728 | SSX2B     | synovial sarcoma, X breakpoint 2B                              | Xp11.22 | 7.64E-03 | 2.75  | 5.52E-05 | 6.04  |
| 8149216 | LINC00965 | long intergenic non-protein coding RNA 965                     | 8p23.1  | 7.76E-03 | -3.48 | 1.01E-02 | -3.29 |
| 8144420 | LINC00965 | long intergenic non-protein coding RNA 965                     | 8p23.1  | 7.78E-03 | -3.38 | 7.03E-03 | -3.45 |
| 8144494 | LINC00965 | long intergenic non-protein coding RNA 965                     | 8p23.1  | 7.78E-03 | -3.38 | 7.03E-03 | -3.45 |
| 8149151 | LINC00965 | long intergenic non-protein coding RNA 965                     | 8p23.1  | 7.80E-03 | -3.35 | 8.85E-03 | -3.26 |
| 8149214 | LINC00965 | long intergenic non-protein coding RNA 965                     | 8p23.1  | 7.80E-03 | -3.35 | 8.85E-03 | -3.26 |
| 8149153 | LINC00965 | long intergenic non-protein coding RNA 965                     | 8p23.1  | 7.88E-03 | -3.34 | 7.65E-03 | -3.35 |
| 8149157 | LINC00965 | long intergenic non-protein coding RNA 965                     | 8p23.1  | 7.88E-03 | -3.34 | 7.65E-03 | -3.35 |
| 8144412 | LINC00965 | long intergenic non-protein coding RNA 965                     | 8p23.1  | 7.88E-03 | -3.20 | 1.04E-02 | -3.04 |
| 8144414 | LINC00965 | long intergenic non-protein coding RNA 965                     | 8p23.1  | 7.88E-03 | -3.20 | 1.04E-02 | -3.04 |
| 7948229 | SLC43A3   | solute carrier family 43, member 3                             | 11q11   | 7.88E-03 | 6.63  | 6.48E-03 | 7.05  |
| 8095819 | FAM47E    | family with sequence similarity 47, member E                   | 4q21.1  | 7.88E-03 | -2.67 | 1.27E-03 | 3.55  |
| 7980485 | DIO2      | deiodinase, iodothyronine, type II                             | 14q31.1 | 8.03E-03 | -4.83 | 2.82E-02 | 3.48  |
| 7934297 | -         | Y_RNA ENSG00000201047                                          | 10q22.1 | 8.36E-03 | 3.82  | 2.14E-02 | 3.17  |
| 8149165 | LINC00965 | long intergenic non-protein coding RNA 965                     | 8p23.1  | 8.48E-03 | -3.39 | 9.75E-03 | -3.30 |
| 8149167 | LINC00965 | long intergenic non-protein coding RNA 965                     | 8p23.1  | 8.48E-03 | -3.39 | 9.75E-03 | -3.30 |
| 7918064 | COL11A1   | collagen, type XI, alpha 1                                     | 1p21    | 8.50E-03 | 2.58  | 8.06E-05 | -5.38 |
| 8103520 | TRIM61    | tripartite motif containing 61                                 | 4q32.3  | 8.50E-03 | -2.86 | 7.51E-03 | -2.92 |

## Gene expression and biofunctions related to a brain metastasis from a PTC

|         |              |                                                          |          |          |       |          |        |
|---------|--------------|----------------------------------------------------------|----------|----------|-------|----------|--------|
| 7986509 | DNM1P46      | dynamamin 1 pseudogene 46                                | 15q26.3  | 8.59E-03 | -4.86 | 3.81E-03 | -6.00  |
| 7986512 | DNM1P46      | dynamamin 1 pseudogene 46                                | 15q26.3  | 8.59E-03 | -4.86 | 3.81E-03 | -6.00  |
| 7986527 | DNM1P46      | dynamamin 1 pseudogene 46                                | 15q26.3  | 8.59E-03 | -4.86 | 3.81E-03 | -6.00  |
| 8105436 | MAP3K1       | mitogen-activated protein kinase kinase kinase 1         | 5q11.2   | 8.62E-03 | 2.07  | 4.76E-07 | 8.08   |
| 8054439 | ST6GAL2      | ST6 beta-galactosamide alpha-2,6-sialyltransferase 2     | 2q11.3   | 8.72E-03 | -2.94 | 6.26E-06 | 11.93  |
| 8124574 | ZSCAN12      | zinc finger and SCAN domain containing 12                | 6p21     | 8.72E-03 | -2.41 | 1.81E-03 | -2.99  |
| 7927186 | RASSF4       | Ras association domain family member 4                   | 10q11.21 | 8.78E-03 | 3.47  | 1.21E-03 | 5.23   |
| 8124654 | GABBR1       | gamma-aminobutyric acid (GABA) B receptor, 1             | 6p21.31  | 8.85E-03 | -2.98 | 1.41E-03 | -4.14  |
| 8164521 | SH3GLB2      | SH3-domain GRB2-like endophilin B2                       | 9q34     | 8.91E-03 | -2.51 | 2.90E-03 | -2.97  |
| 7953981 | ETV6         | ets variant 6                                            | 12p13    | 8.92E-03 | 2.33  | 7.75E-04 | 3.27   |
| 7945663 | IFITM10      | interferon induced transmembrane protein 10              | 11p15.5  | 8.92E-03 | 3.39  | 2.23E-02 | 2.82   |
| 8148304 | TRIB1        | tribbles pseudokinase 1                                  | 8q24.13  | 9.07E-03 | -2.32 | 1.24E-04 | 4.30   |
| 8040223 | RRM2         | ribonucleotide reductase M2                              | 2p25.1   | 9.41E-03 | 3.26  | 1.33E-03 | 4.74   |
| 8053467 | SFTPB        | surfactant protein B                                     | 2p11.2   | 9.50E-03 | 35.26 | 7.31E-04 | 164.67 |
| 7976816 | SNORD114-3   | small nucleolar RNA, C/D box 114-3                       | 14q32.31 | 9.55E-03 | 6.30  | 7.29E-03 | -6.85  |
| 8179595 | GABBR1       | gamma-aminobutyric acid (GABA) B receptor, 1             | 6p21.31  | 9.67E-03 | -3.36 | 2.08E-03 | -4.57  |
| 8117572 | ZNF391       | zinc finger protein 391                                  | 6p22.1   | 9.84E-03 | -2.51 | 3.64E-03 | -2.92  |
| 7981718 | EPC1         | enhancer of polycomb homolog 1 (Drosophila)              | 10p11    | 1.02E-02 | 10.02 | 2.70E-02 | 6.84   |
| 7919168 | PDE4DIP      | phosphodiesterase 4D interacting protein                 | 1q12     | 1.02E-02 | 2.65  | 1.73E-02 | 2.43   |
| 8143850 | CDK5         | cyclin-dependent kinase 5                                | 7q36     | 1.02E-02 | 2.98  | 2.49E-03 | 3.87   |
| 8155696 | FAM122A      | family with sequence similarity 122A                     | 9q21.11  | 1.04E-02 | -2.25 | 2.48E-04 | -3.78  |
| 8119161 | PIM1         | Pim-1 proto-oncogene, serine/threonine kinase            | 6p21.2   | 1.04E-02 | 2.44  | 1.26E-02 | 2.37   |
| 7981046 | IFI27L2      | interferon, alpha-inducible protein 27-like 2            | 14q32.12 | 1.05E-02 | -2.12 | 2.50E-03 | -2.55  |
| 8178298 | GABBR1       | gamma-aminobutyric acid (GABA) B receptor, 1             | 6p21.31  | 1.05E-02 | -3.24 | 1.63E-03 | -4.69  |
| 8166264 | -            | -                                                        |          | 1.05E-02 | 2.25  | 1.32E-02 | 2.19   |
| 7902913 | CDC7         | cell division cycle 7                                    | 1p22     | 1.06E-02 | 2.97  | 1.95E-03 | 4.05   |
| 8062427 | VSTM2L       | V-set and transmembrane domain containing 2 like         | 20q11.23 | 1.06E-02 | 2.55  | 3.36E-03 | 3.05   |
| 8022803 | GAREM        | GRB2 associated, regulator of MAPK1                      | 18q12.1  | 1.07E-02 | 3.20  | 1.58E-02 | 2.99   |
| 7929282 | HHEX         | hematopoietically expressed homeobox                     | 10q23.33 | 1.07E-02 | -3.39 | 3.08E-02 | 2.71   |
| 8098328 | GALNT7       | polypeptide N-acetylgalactosaminyltransferase 7          | 4q31.1   | 1.08E-02 | -2.02 | 7.96E-06 | 5.16   |
| 8094190 | CC2D2A       | coiled-coil and C2 domain containing 2A                  | 4p15.32  | 1.08E-02 | -2.82 | 3.04E-03 | -3.51  |
| 7996160 | LOC388282    | uncharacterized LOC388282                                | 16q13    | 1.09E-02 | 2.71  | 1.55E-03 | 3.72   |
| 8093171 | MFI2         | MFI2 antisense RNA 1                                     | 3q29     | 1.09E-02 | 3.48  | 9.59E-04 | 5.88   |
| 8157463 | C9orf91      | chromosome 9 open reading frame 91                       | 9q32     | 1.13E-02 | -2.31 | 1.31E-03 | -3.11  |
| 8123951 | ADTRP        | androgen-dependent TFPI-regulating protein               | 6p24.1   | 1.13E-02 | 5.42  | 1.25E-04 | 20.81  |
| 8160033 | SNRPE        | small nuclear ribonucleoprotein polypeptide E            | 1q32     | 1.15E-02 | 2.26  | 1.46E-02 | 2.19   |
| 8022506 | RNU6-702P    | RNA, U6 small nuclear 702, pseudogene                    | -        | 1.17E-02 | 2.26  | 1.40E-02 | 2.21   |
| 8043360 | IGKV3OR2-268 | immunoglobulin kappa variable 3/OR2-268 (non-functional) | 2p11.2   | 1.18E-02 | 2.94  | 9.03E-03 | 3.09   |
| 8158406 | TBC1D13      | TBC1 domain family, member 13                            | 9q34.11  | 1.19E-02 | -2.26 | 3.59E-03 | -2.68  |
| 7986520 | LOC101927628 | uncharacterized LOC101927628                             | 15q26.3  | 1.21E-02 | -4.78 | 6.05E-03 | -5.78  |
| 8104825 | BRX1         | BRX1, biogenesis of ribosomes, homolog (S. cerevisiae)   | 5p13.2   | 1.22E-02 | 2.22  | 1.37E-02 | 2.18   |



## Gene expression and biofunctions related to a brain metastasis from a PTC

|         |           |                                                               |          |          |       |          |       |
|---------|-----------|---------------------------------------------------------------|----------|----------|-------|----------|-------|
| 8053801 | ANKRD36   | ankyrin repeat domain 36                                      | 2q11.2   | 1.25E-02 | -2.38 | 1.06E-02 | -2.46 |
| 7973743 | BNIP3P1   | BCL2/adenovirus E1B 19 kDa interacting protein 3 pseudogene 1 | 14q12    | 1.27E-02 | 2.59  | 3.98E-04 | 4.51  |
| 8081548 | PVRL3     | poliovirus receptor-related 3                                 | 3q13     | 1.29E-02 | -4.93 | 3.52E-02 | -3.69 |
| 7986517 | DNM1P47   | dynamin 1 pseudogene 47                                       | 15q26.3  | 1.31E-02 | -4.80 | 6.20E-03 | -5.91 |
| 7986522 | DNM1P47   | dynamin 1 pseudogene 47                                       | 15q26.3  | 1.31E-02 | -4.80 | 6.20E-03 | -5.91 |
| 8001449 | IRX3      | iroquois homeobox 3                                           | 16q12.2  | 1.36E-02 | 4.29  | 2.60E-02 | 3.62  |
| 7960177 | SLC6A12   | solute carrier family 6 member 12                             | 12p13.33 | 1.40E-02 | 2.89  | 1.91E-04 | 6.40  |
| 7909127 | MFSD4     | major facilitator superfamily domain containing 4             | 1q32.1   | 1.40E-02 | 2.17  | 2.43E-03 | 2.77  |
| 8150988 | ASPH      | aspartate beta-hydroxylase                                    | 8q12.1   | 1.41E-02 | -2.03 | 4.75E-03 | -2.33 |
| 8159501 | LCN12     | lipocalin 12                                                  | 9q34.3   | 1.41E-02 | -2.76 | 1.43E-02 | 2.75  |
| 8163444 | ZFP37     | ZFP37 zinc finger protein                                     | 9q32     | 1.43E-02 | -3.23 | 1.32E-02 | -3.28 |
| 7943376 | KIAA1377  | KIAA1377                                                      | 11q22.1  | 1.43E-02 | -3.17 | 1.15E-02 | -3.31 |
| 8009417 | KPNA2     | karyopherin alpha 2 (RAG cohort 1, importin alpha 1)          | 17q24.2  | 1.44E-02 | 2.35  | 2.19E-02 | 2.21  |
| 8019737 | KPNA2     | karyopherin alpha 2 (RAG cohort 1, importin alpha 1)          | 17q24.2  | 1.51E-02 | 2.32  | 2.14E-02 | 2.20  |
| 8170630 | PNMAG6    | paraneoplastic Ma antigen family member 6A                    | Xq28     | 1.51E-02 | -2.35 | 5.94E-03 | -2.72 |
| 8172787 | SSX2B     | synovial sarcoma, X breakpoint 2B                             | Xp11.22  | 1.53E-02 | 2.76  | 7.52E-05 | 6.84  |
| 7920264 | S100A5    | S100 calcium binding protein A5                               | 1q21     | 1.56E-02 | 3.10  | 7.21E-04 | 5.85  |
| 8043470 | IGKV3D-11 | immunoglobulin kappa variable 3D-11                           | 2p11.2   | 1.57E-02 | 6.36  | 1.91E-02 | 5.95  |
| 8140840 | STEAP4    | STEAP family member 4                                         | 7q21.12  | 1.59E-02 | 10.09 | 1.62E-02 | 10.02 |
| 8059852 | MSL3P1    | male-specific lethal 3 homolog (Drosophila) pseudogene 1      | 2q37     | 1.60E-02 | -3.20 | 7.53E-03 | -3.75 |
| 8138527 | STEAP1B   | STEAP family member 1B                                        | 7p15.3   | 1.65E-02 | 2.32  | 2.87E-03 | 3.01  |
| 8038126 | CA11      | carbonic anhydrase XI                                         | 19q13.3  | 1.68E-02 | -3.52 | 4.21E-02 | -2.82 |
| 8021169 | LIPG      | lipase, endothelial                                           | 18q21.1  | 1.69E-02 | -3.83 | 2.51E-04 | 11.09 |
| 8068383 | CLIC6     | chloride intracellular channel 6                              | 21q22.12 | 1.70E-02 | -4.84 | 4.62E-03 | -7.10 |
| 8174937 | TENM1     | teneurin transmembrane protein 1                              | Xq25     | 1.71E-02 | -6.94 | 4.14E-02 | 5.00  |
| 7996027 | CX3CL1    | chemokine (C-X3-C motif) ligand 1                             | 16q13    | 1.72E-02 | 3.54  | 9.46E-03 | 4.07  |
| 8043449 | IGKV3D-20 | immunoglobulin kappa variable 3D-20                           | 2p11.2   | 1.74E-02 | 5.18  | 2.03E-02 | 4.93  |
| 7910398 | RAB4A     | RAB4A, member RAS oncogene family                             | 1q42.13  | 1.75E-02 | 2.40  | 2.11E-02 | 2.33  |
| 8145281 | SLC25A37  | solute carrier family 25 member 37                            | 8p21.2   | 1.76E-02 | 2.59  | 4.30E-03 | 3.32  |
| 7919971 | RFX5      | regulatory factor X, 5 (influences HLA class II expression)   | 1q21.3   | 1.78E-02 | 2.17  | 1.92E-02 | 2.15  |
| 8146839 | C8orf34   | chromosome 8 open reading frame 34                            | 8q13     | 1.79E-02 | 4.29  | 4.52E-03 | -6.40 |
| 8131583 | BZW2      | basic leucine zipper and W2 domains 2                         | 7p21.1   | 1.80E-02 | 2.32  | 2.88E-04 | 4.42  |
| 7940182 | OR4D10    | olfactory receptor, family 4, subfamily D, member 10          | 11q12    | 1.82E-02 | 3.68  | 5.05E-03 | 5.04  |
| 7943803 | DIXDC1    | DIX domain containing 1                                       | 11q23.1  | 1.82E-02 | -2.55 | 1.37E-03 | -4.03 |
| 7960865 | SLC2A3    | solute carrier family 2 member 3                              | 12p13.31 | 1.83E-02 | 4.96  | 7.78E-03 | 6.41  |
| 7986515 | DNM1P47   | dynamin 1 pseudogene 47                                       | 15q26.3  | 1.83E-02 | -4.27 | 1.04E-02 | -4.99 |
| 7986525 | DNM1P47   | dynamin 1 pseudogene 47                                       | 15q26.3  | 1.83E-02 | -4.27 | 1.04E-02 | -4.99 |
| 8133976 | DBF4      | DBF4 zinc finger                                              | 7q21.3   | 1.90E-02 | 2.23  | 8.51E-03 | 2.52  |
| 8102247 | RPL34-AS1 | RPL34 antisense RNA 1 (head to head)                          | 4q25     | 1.91E-02 | -2.49 | 1.44E-02 | -2.63 |
| 8108301 | KIF20A    | kinesin family member 20A                                     | 5q31     | 1.92E-02 | 3.97  | 1.08E-02 | 4.63  |
| 8131944 | NFE2L3    | nuclear factor, erythroid 2-like 3                            | 7p15.2   | 1.92E-02 | 4.67  | 3.64E-03 | 7.51  |

## Gene expression and biofunctions related to a brain metastasis from a PTC

|         |           |                                                                   |          |          |       |          |        |
|---------|-----------|-------------------------------------------------------------------|----------|----------|-------|----------|--------|
| 7908793 | ELF3      | E74 like ETS transcription factor 3                               | 1q32.1   | 1.93E-02 | 4.56  | 1.40E-04 | 19.55  |
| 8107706 | LMNB1     | lamin B1                                                          | 5q23.2   | 1.93E-02 | 2.02  | 7.06E-04 | 3.17   |
| 8056184 | ITGB6     | integrin, beta 6                                                  | 2q24.2   | 1.95E-02 | 7.26  | 3.44E-05 | 88.60  |
| 8161520 | PGM5      | phosphoglucomutase 5                                              | 9q13     | 1.99E-02 | -2.07 | 5.79E-08 | -17.86 |
| 7905406 | CGN       | cingulin                                                          | 1q21     | 2.03E-02 | 2.37  | 4.25E-05 | 6.64   |
| 7923189 | KIF14     | kinesin family member 14                                          | 1q32.1   | 2.04E-02 | 2.55  | 7.59E-03 | 3.05   |
| 7980098 | ALDH6A1   | aldehyde dehydrogenase 6 family, member A1                        | 14q24.3  | 2.04E-02 | -2.36 | 2.34E-03 | -3.38  |
| 8115666 | NUDCD2    | NudC domain containing 2                                          | 5q34     | 2.06E-02 | 2.21  | 1.65E-02 | 2.28   |
| 8097017 | UGT8      | UDP glycosyltransferase 8                                         | 4q26     | 2.07E-02 | 3.33  | 4.47E-04 | 7.87   |
| 7981722 | IGHV3-7   | immunoglobulin heavy variable 3-7                                 | 14q32.33 | 2.08E-02 | 9.22  | 4.35E-02 | 6.64   |
| 8040458 | KCNS3     | potassium voltage-gated channel modifier subfamily S member 3     | 2p24.2   | 2.09E-02 | 2.86  | 4.77E-04 | 6.07   |
| 8109612 | ADRA1B    | adrenoceptor alpha 1B                                             | 5q33.3   | 2.09E-02 | 2.68  | 6.36E-03 | 3.36   |
| 8077899 | PPARG     | peroxisome proliferator-activated receptor gamma                  | 3p25     | 2.11E-02 | 2.86  | 1.13E-02 | 3.25   |
| 8154670 | IFT74     | intraflagellar transport 74                                       | 9p21.2   | 2.12E-02 | -2.55 | 2.49E-02 | -2.47  |
| 8025478 | ZNF559    | zinc finger protein 559                                           | 19p13.2  | 2.14E-02 | -2.44 | 1.16E-02 | -2.71  |
| 8068833 | PDE9A     | phosphodiesterase 9A                                              | 21q22.3  | 2.15E-02 | 2.34  | 1.44E-05 | 8.32   |
| 8143663 | EZH2      | enhancer of zeste 2 polycomb repressive complex 2 subunit         | 7q36.1   | 2.23E-02 | 2.77  | 3.40E-03 | 4.04   |
| 7990151 | PKM       | pyruvate kinase, muscle                                           | 15q22    | 2.25E-02 | 2.26  | 3.91E-02 | 2.06   |
| 8145570 | ESCO2     | establishment of sister chromatid cohesion N-acetyltransferase 2  | 8p21.1   | 2.26E-02 | 3.23  | 7.28E-03 | 4.18   |
| 8161945 | RASEF     | RAS and EF-hand domain containing                                 | 9q21.32  | 2.28E-02 | -2.39 | 1.69E-04 | 5.75   |
| 8021470 | PMAIP1    | phorbol-12-myristate-13-acetate-induced protein 1                 | 18q21.32 | 2.28E-02 | 6.57  | 5.85E-03 | 10.91  |
| 8169235 | FRMPD3    | FERM and PDZ domain containing 3                                  | Xq22     | 2.28E-02 | 3.30  | 1.65E-03 | 6.11   |
| 8167835 | TRO       | trophinin                                                         | Xp11.21  | 2.30E-02 | -2.44 | 1.36E-03 | -3.96  |
| 8110478 | ZNF454    | zinc finger protein 454                                           | 5q35.3   | 2.33E-02 | -2.56 | 4.51E-03 | -3.44  |
| 8037322 | ETHE1     | ethylmalonic encephalopathy 1                                     | 19q13.31 | 2.37E-02 | 2.37  | 2.19E-02 | 2.40   |
| 8063923 | SLC04A1   | solute carrier organic anion transporter family, member 4A1       | 20q13.33 | 2.38E-02 | 2.35  | 2.25E-03 | 3.47   |
| 7988380 | DUOXA1    | dual oxidase maturation factor 1                                  | 15q21.1  | 2.39E-02 | -2.80 | 3.58E-02 | 2.57   |
| 8147030 | STMN2     | stathmin 2                                                        | 8q21.13  | 2.46E-02 | 4.01  | 9.76E-03 | 5.20   |
| 7910001 | DEGS1     | delta(4)-desaturase, sphingolipid 1                               | 1q42.11  | 2.47E-02 | 2.20  | 5.45E-03 | 2.80   |
| 8083166 | TRPC1     | transient receptor potential cation channel subfamily C member 1  | 3q23     | 2.49E-02 | -2.87 | 3.40E-04 | -7.07  |
| 8126303 | TREM1     | triggering receptor expressed on myeloid cells 1                  | 6p21.1   | 2.53E-02 | 5.91  | 1.73E-03 | 15.39  |
| 8056363 | SLC38A11  | solute carrier family 38, member 11                               | 2q24.3   | 2.55E-02 | 3.06  | 9.82E-03 | 3.80   |
| 8040365 | TRIB2     | tribbles pseudokinase 2                                           | 2p24.3   | 2.59E-02 | 2.43  | 2.35E-02 | -2.49  |
| 8123936 | NEDD9     | neural precursor cell expressed, developmentally down-regulated 9 | 6p24.2   | 2.60E-02 | 3.74  | 1.21E-02 | 4.60   |
| 8144228 | FLJ36840  | uncharacterized LOC645524                                         | -        | 2.69E-02 | -2.45 | 2.40E-02 | -2.51  |
| 8044499 | SLC20A1   | solute carrier family 20 (phosphate transporter), member 1        | 2q14.1   | 2.94E-02 | 2.80  | 1.14E-03 | 5.38   |
| 8112376 | CENPK     | centromere protein K                                              | 5q12.3   | 3.01E-02 | 2.50  | 7.95E-04 | 5.02   |
| 8065719 | PXMP4     | peroxisomal membrane protein 4, 24 kDa                            | 20q11.22 | 3.03E-02 | -5.07 | 1.78E-02 | -6.09  |
| 8084206 | B3GNT5    | UDP-GlcNAc:betaGal beta-1,3-N-acetylglucosaminyltransferase 5     | 3q27.1   | 3.08E-02 | 2.63  | 1.52E-02 | 3.05   |
| 8043476 | IGKV1D-43 | immunoglobulin kappa variable 1D-43                               | 2p11.2   | 3.11E-02 | 3.43  | 4.03E-02 | 3.20   |
| 7909601 | SNORA16B  | small nucleolar RNA, H/ACA box 16B                                | 1q32.3   | 3.15E-02 | 2.79  | 1.15E-02 | 3.48   |

## Gene expression and biofunctions related to a brain metastasis from a PTC

|         |             |                                                                |           |          |       |          |        |
|---------|-------------|----------------------------------------------------------------|-----------|----------|-------|----------|--------|
| 7940173 | OR5A1       | olfactory receptor, family 5, subfamily A, member 1            | 11q12.1   | 3.25E-02 | 2.36  | 8.99E-03 | 2.96   |
| 7915910 | PDZK1IP1    | PDZK1 interacting protein 1                                    | 1p33      | 3.25E-02 | 8.78  | 7.85E-03 | 16.83  |
| 7953218 | RAD51AP1    | RAD51 associated protein 1                                     | 12p13.32  | 3.26E-02 | 2.07  | 1.71E-03 | 3.26   |
| 8054281 | LONRF2      | LON peptidase N-terminal domain and ring finger 2              | 2q11.2    | 3.32E-02 | -2.47 | 1.89E-02 | 2.77   |
| 8001104 | IGHV3OR16-7 | immunoglobulin heavy variable 3/OR16-7 (pseudogene)            | 16p11.2   | 3.46E-02 | 4.66  | 4.02E-02 | 4.42   |
| 7906930 | NUF2        | NUF2, NDC80 kinetochore complex component                      | 1q23.3    | 3.46E-02 | 2.83  | 1.07E-02 | 3.70   |
| 8124402 | HIST1H1T    | histone cluster 1, H1t                                         | 6p21.3    | 3.47E-02 | 2.13  | 1.06E-02 | 2.59   |
| 7917503 | GBP3        | guanylate binding protein 3                                    | 1p22.2    | 3.52E-02 | 3.52  | 5.11E-03 | 5.96   |
| 8007071 | CDC6        | cell division cycle 6                                          | 17q21.3   | 3.52E-02 | 2.21  | 2.13E-03 | 3.59   |
| 8103822 | VEGFC       | vascular endothelial growth factor C                           | 4q34.3    | 3.61E-02 | -2.20 | 7.95E-04 | 4.25   |
| 7990054 | UACA        | uveal autoantigen with coiled-coil domains and ankyrin repeats | 15q23     | 3.66E-02 | -3.02 | 3.65E-02 | -3.02  |
| 8165735 | CSF2RA      | colony stimulating factor 2 receptor alpha subunit             | Xp22.33   | 3.76E-02 | 2.37  | 2.82E-02 | -2.51  |
| 8176306 | CSF2RA      | colony stimulating factor 2 receptor alpha subunit             | Xp22.33   | 3.76E-02 | 2.37  | 2.82E-02 | -2.51  |
| 8096845 | EGF         | epidermal growth factor                                        | 4q25      | 3.77E-02 | 2.43  | 9.81E-04 | 4.97   |
| 8115397 | FAXDC2      | fatty acid hydroxylase domain containing 2                     | 5q33.2    | 3.80E-02 | -3.10 | 3.54E-03 | -5.63  |
| 7907830 | QSOX1       | quiescin Q6 sulfhydryl oxidase 1                               | 1q24      | 3.85E-02 | 2.56  | 1.37E-02 | 3.19   |
| 7927710 | CDK1        | cyclin-dependent kinase 1                                      | 10q21.1   | 3.89E-02 | 3.32  | 1.03E-02 | 4.75   |
| 8019857 | NDC80       | NDC80 kinetochore complex component                            | 18p11.32  | 3.90E-02 | 2.09  | 5.86E-03 | 2.85   |
| 8169598 | ZCCHC12     | zinc finger, CCHC domain containing 12                         | Xq24      | 3.90E-02 | -3.17 | 5.98E-06 | 35.85  |
| 8146500 | LYN         | LYN proto-oncogene, Src family tyrosine kinase                 | 8q13      | 3.98E-02 | 3.12  | 1.57E-02 | 3.98   |
| 7979505 | SIX1        | SIX homeobox 1                                                 | 14q23.1   | 4.05E-02 | 2.87  | 3.74E-05 | -15.94 |
| 7905731 | UBAP2L      | ubiquitin associated protein 2-like                            | 1q21.3    | 4.11E-02 | 2.13  | 2.60E-02 | 2.30   |
| 7905929 | EFNA1       | ephrin-A1                                                      | 1q21.3q22 | 4.21E-02 | 2.54  | 2.99E-03 | 4.44   |
| 8115623 | ATP10B      | ATPase, class V, type 10B                                      | 5q34      | 4.55E-02 | 2.91  | 3.24E-03 | 5.59   |
| 7932132 | FRMD4A      | FERM domain containing 4A                                      | 10p13     | 4.64E-02 | 2.32  | 4.60E-02 | -2.32  |
